# Supplementary material for: Sequential Immunization with Universal Live Attenuated Influenza Vaccine Candidates Protects Ferrets against a High-Dose Heterologous Virus Challenge
Source: PubMed Central journal article supplement (PMC6789596; doi:10.3390/vaccines7030061), 2019-07-08
Supplement: vaccines-07-00061-s001.pdf [file vaccines-07-00061-s001.pdf]

Article

# Sequential Immunization with Universal Live Attenuated Influenza Vaccine Candidates Protects Ferrets against a High-Dose Heterologous Virus Challenge

Irina Isakova-Sivak, Victoria Matyushenko, Tatiana Kotomina, Irina Kiseleva, Elena Krutikova, Svetlana Donina, Andrey Rekstin, Natalia Larionova, Daria Mezhenkaya, Konstantin Sivak, Arman Muzhikyan, Anastasia Katelnikova and Larisa Rudenko

Supplementary Materials

**Table S1.** Individual nasal turbinates pathology scores for immunized ferrets after challenge with H1N1pdm09 virus.

| Vaccine group      | Animal ID | Affected tissue (%) | NT pathology parameters |           |                        |         |       | Total NT pathology score |
|--------------------|-----------|---------------------|-------------------------|-----------|------------------------|---------|-------|--------------------------|
|                    |           |                     | Epithelium damage       | Hyperemia | Lymphocytic infiltrate | Exudate | Edema |                          |
| cHA LAIVs (NP-MDV) | 1.1       | 70                  | 3                       | 1         | 3                      | 4       | 3     | 14                       |
|                    | 1.2       | 5                   | 0                       | 2         | 1                      | 0       | 0     | 3                        |
|                    | 1.3       | 50                  | 2                       | 2         | 2                      | 3       | 2     | 11                       |
|                    | 1.4       | 60                  | 3                       | 3         | 3                      | 4       | 4     | 17                       |
| cHA LAIVs (NP-WT)  | 2.1       | 5                   | 1                       | 1         | 1                      | 1       | 0     | 4                        |
|                    | 2.2       | 20                  | 2                       | 3         | 2                      | 1       | 2     | 10                       |
|                    | 2.3       | 20                  | 2                       | 2         | 3                      | 2       | 1     | 10                       |
|                    | 2.4       | 10                  | 1                       | 1         | 2                      | 1       | 1     | 6                        |
| LAIVs (NP-MDV)     | 3.1       | 65                  | 3                       | 4         | 3                      | 4       | 4     | 18                       |
|                    | 3.2       | 20                  | 1                       | 3         | 1                      | 1       | 2     | 8                        |
|                    | 3.3       | 30                  | 2                       | 3         | 1                      | 2       | 2     | 10                       |
|                    | 3.4       | 75                  | 2                       | 3         | 3                      | 1       | 4     | 13                       |
| Mock (PBS)         | 4.1       | 70                  | 4                       | 3         | 4                      | 5       | 5     | 21                       |
|                    | 4.2       | 80                  | 4                       | 5         | 4                      | 5       | 4     | 22                       |
|                    | 4.3       | 60                  | 4                       | 3         | 3                      | 4       | 3     | 17                       |
|                    | 4.4       | 50                  | 4                       | 4         | 4                      | 4       | 4     | 20                       |

**Table S2.** Individual lung pathology scores for immunized ferrets after challenge with H1N1pdm09 virus.

| Vaccine group      | Animal ID | Damage (0-5)           |            |                        |            |                            |            |                     |            | Inflammation (0-5)           |                 |                    |                      |            |               |                |                   |                         |            | Total lung pathology score |            |                  |
|--------------------|-----------|------------------------|------------|------------------------|------------|----------------------------|------------|---------------------|------------|------------------------------|-----------------|--------------------|----------------------|------------|---------------|----------------|-------------------|-------------------------|------------|----------------------------|------------|------------------|
|                    |           | Epithelium hypertrophy |            | Epithelium hyperplasia |            | Pseudo squamous epithelium |            | Epithelium necrosis |            | Hypertrophy pneumocyte type2 | Hyperemia septa | Alveolar emphysema | Alveolar hemorrhages | Bronchitis | Bronchiolitis | Peribronchitis | Peribronchiolitis | Interstitial infiltrate | Alveolitis |                            | Vasculitis | Perivascularitis |
|                    |           | bronchi                | bronchioli | bronchi                | bronchioli | bronchi                    | bronchioli | bronchi             | bronchioli |                              |                 |                    |                      |            |               |                |                   |                         |            |                            |            |                  |
| cHA LAIVs (NP-MDV) | 1.1       | 3                      | 2          | 2                      | 3          | 0                          | 1          | 2                   | 3          | 3                            | 4               | 2                  | 1                    | 3          | 2             | 4              | 3                 | 3                       | 3          | 2                          | 3          | 49               |
|                    | 1.2       | 2                      | 1          | 1                      | 2          | 0                          | 0          | 0                   | 3          | 3                            | 2               | 1                  | 1                    | 1          | 2             | 2              | 4                 | 3                       | 1          | 2                          | 31         |                  |
|                    | 1.3       | 0                      | 1          | 1                      | 2          | 0                          | 0          | 0                   | 1          | 2                            | 2               | 3                  | 0                    | 0          | 2             | 1              | 2                 | 3                       | 2          | 0                          | 1          | 23               |
|                    | 1.4       | 3                      | 2          | 2                      | 1          | 0                          | 0          | 3                   | 3          | 3                            | 1               | 4                  | 1                    | 4          | 4             | 3              | 3                 | 2                       | 2          | 1                          | 2          | 45               |
| cHA LAIVs (NP-WT)  | 2.1       | 0                      | 0          | 2                      | 1          | 0                          | 1          | 0                   | 2          | 2                            | 2               | 2                  | 0                    | 1          | 1             | 0              | 2                 | 2                       | 0          | 2                          | 2          | 18               |
|                    | 2.2       | 1                      | 0          | 2                      | 1          | 0                          | 0          | 0                   | 2          | 2                            | 1               | 2                  | 1                    | 1          | 2             | 1              | 2                 | 2                       | 1          | 2                          | 23         |                  |
|                    | 2.3       | 0                      | 1          | 1                      | 1          | 0                          | 1          | 0                   | 3          | 1                            | 3               | 0                  | 1                    | 1          | 2             | 2              | 3                 | 2                       | 1          | 2                          | 25         |                  |
|                    | 2.4       | 1                      | 1          | 1                      | 0          | 0                          | 0          | 0                   | 2          | 3                            | 2               | 0                  | 0                    | 1          | 3             | 2              | 2                 | 3                       | 3          | 2                          | 2          | 28               |
| LAIVs (NP-MDV)     | 3.1       | 0                      | 2          | 0                      | 1          | 0                          | 0          | 0                   | 3          | 2                            | 2               | 0                  | 1                    | 1          | 1             | 2              | 4                 | 3                       | 1          | 2                          | 25         |                  |
|                    | 3.2       | 2                      | 3          | 2                      | 2          | 0                          | 1          | 1                   | 3          | 2                            | 3               | 0                  | 2                    | 2          | 2             | 1              | 3                 | 3                       | 2          | 3                          | 39         |                  |
|                    | 3.3       | 1                      | 2          | 1                      | 3          | 0                          | 2          | 0                   | 1          | 3                            | 2               | 1                  | 3                    | 2          | 1             | 2              | 2                 | 3                       | 3          | 1                          | 2          | 35               |
|                    | 3.4       | 2                      | 2          | 2                      | 2          | 0                          | 0          | 3                   | 4          | 4                            | 2               | 4                  | 3                    | 4          | 5             | 3              | 4                 | 4                       | 3          | 3                          | 4          | 58               |
| Mock (PBS)         | 4.1       | 3                      | 3          | 2                      | 3          | 0                          | 2          | 2                   | 4          | 4                            | 4               | 3                  | 1                    | 2          | 4             | 3              | 4                 | 5                       | 4          | 3                          | 3          | 59               |
|                    | 4.2       | 2                      | 2          | 3                      | 4          | 0                          | 2          | 0                   | 0          | 4                            | 3               | 2                  | 2                    | 1          | 1             | 2              | 0                 | 3                       | 2          | 0                          | 1          | 34               |
|                    | 4.3       | 2                      | 2          | 3                      | 3          | 1                          | 1          | 0                   | 2          | 3                            | 3               | 3                  | 4                    | 2          | 2             | 2              | 2                 | 4                       | 3          | 2                          | 3          | 47               |
|                    | 4.4       | 3                      | 3          | 4                      | 3          | 2                          | 2          | 3                   | 3          | 4                            | 4               | 4                  | 2                    | 4          | 5             | 5              | 5                 | 5                       | 5          | 4                          | 4          | 74               |

## Correlation of assay results and body temperature increase

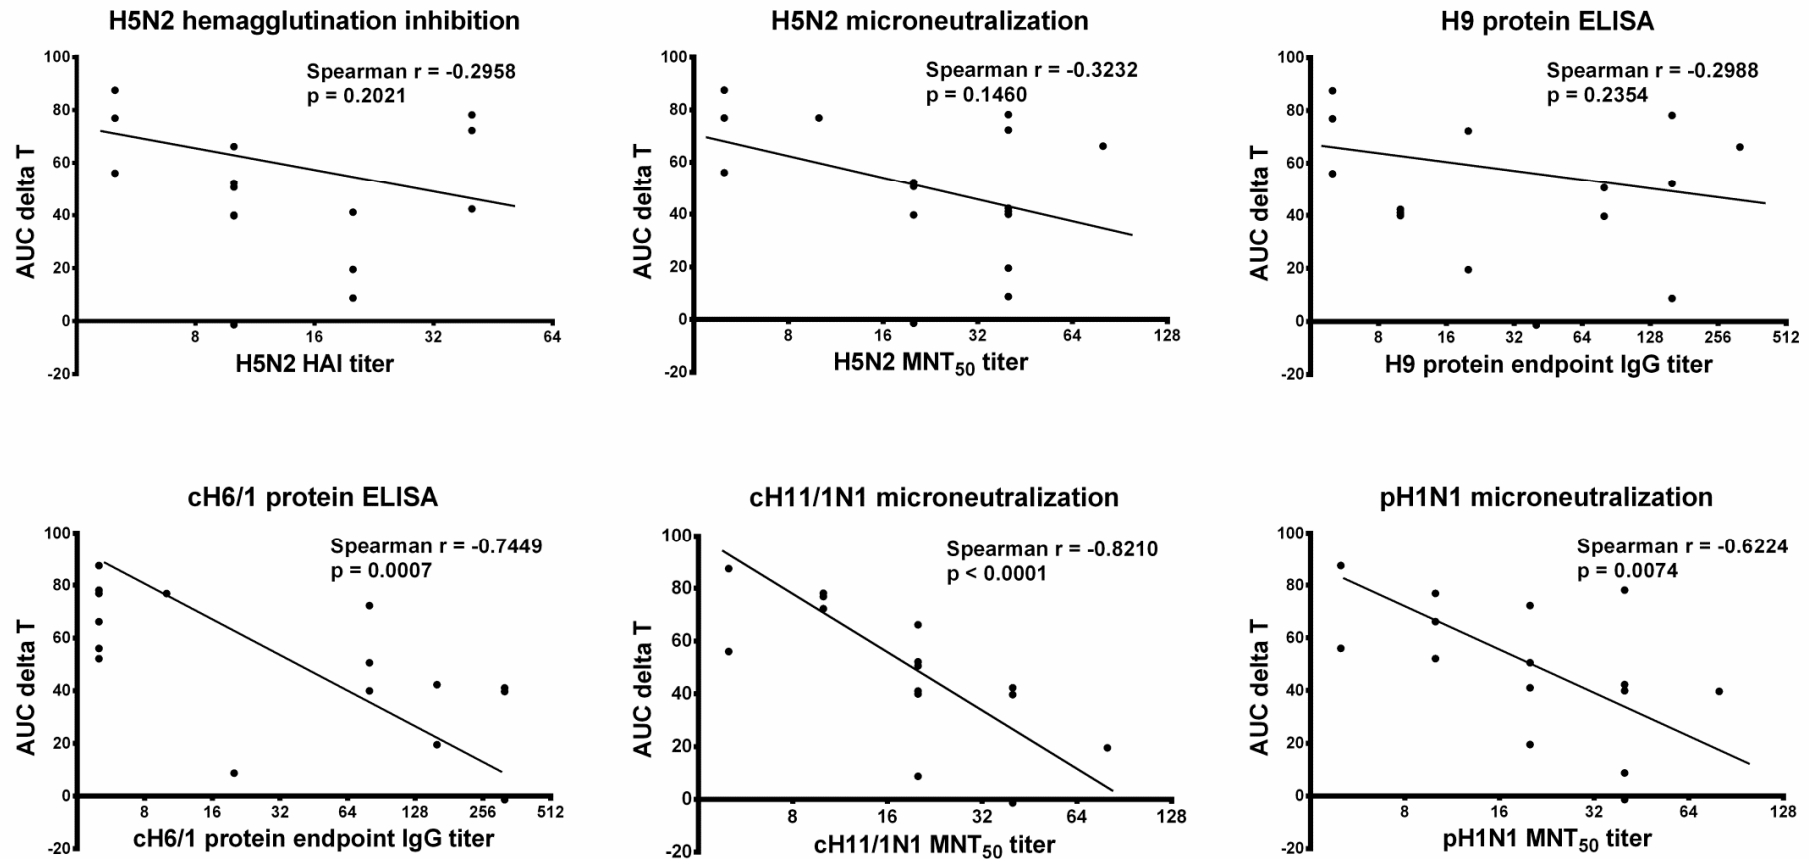

**Figure S1.** Correlation of some representative antibody immune responses of ferrets after immunization with body temperature increase measured by the area under the curve during the challenge phase.

## Correlation of assay results and lung pathology score

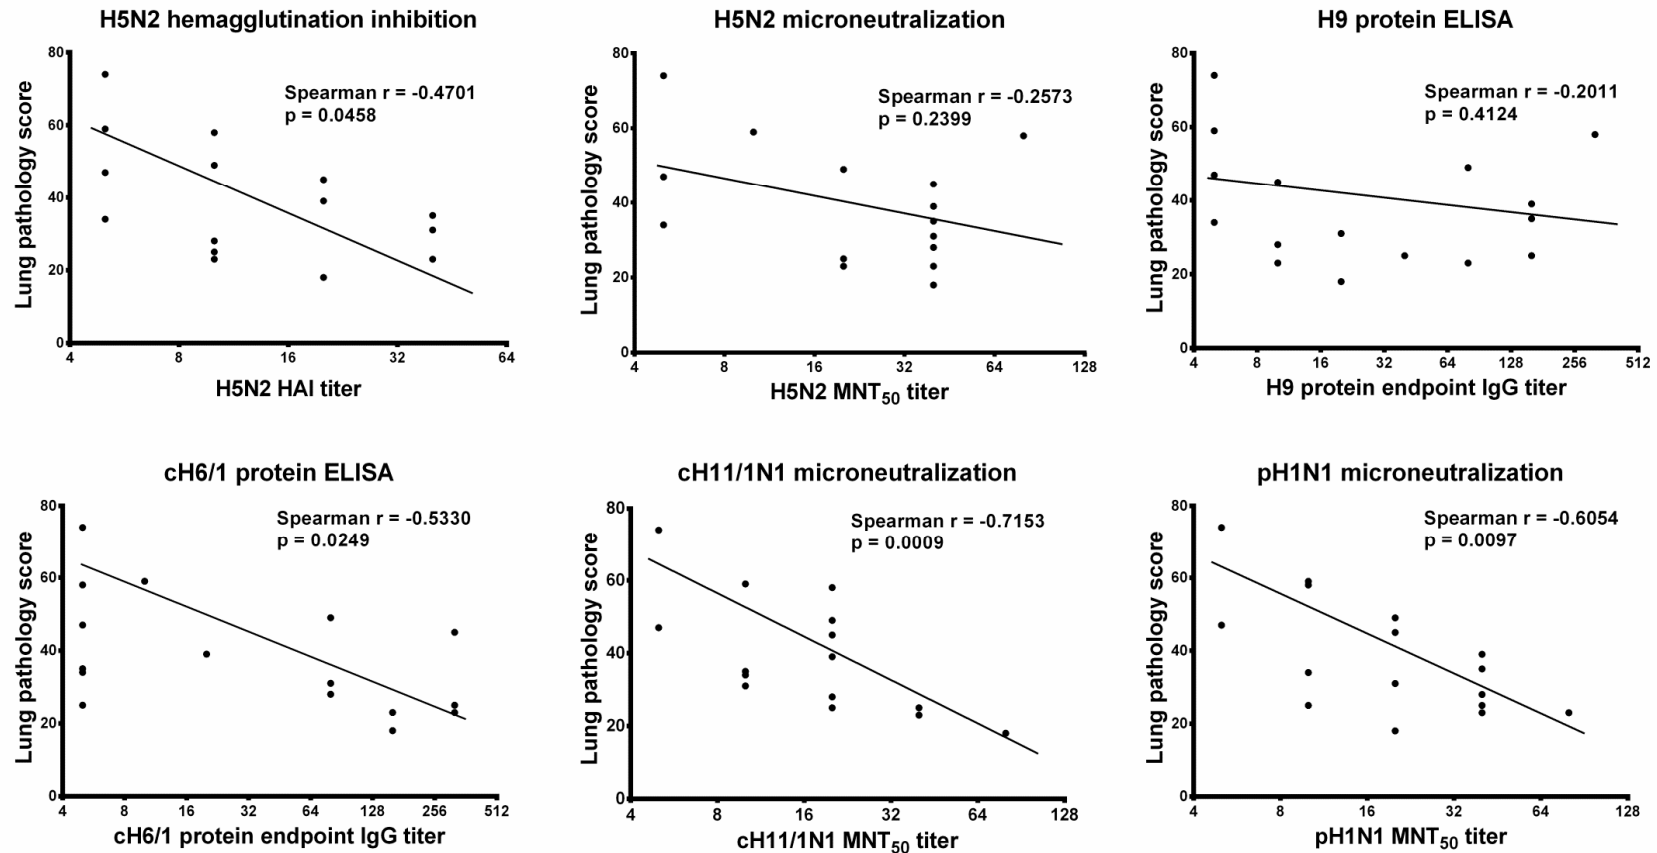

**Figure S2.** Correlation of some representative antibody immune responses of ferrets after immunization with lung pathology score defined during histopathological analysis of lung tissue sections.

## Correlation of assay results and pH1N1 virus titer in lung

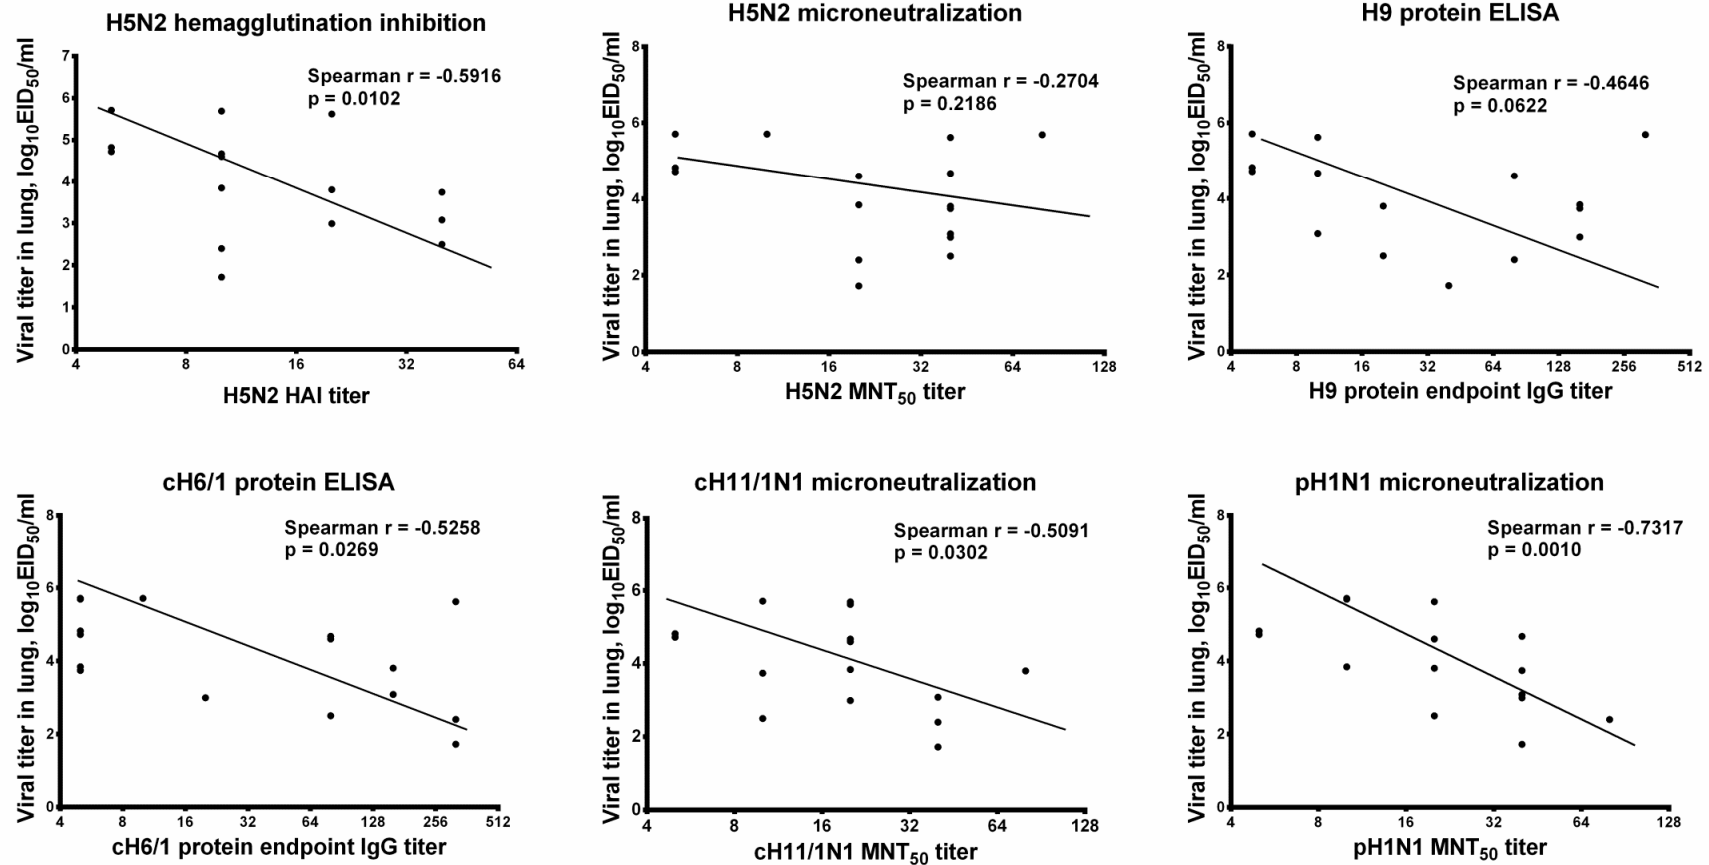

Figure S3. Correlation of some representative antibody immune responses of ferrets after immunization with viral titer in lung on day 4 post-challenge.

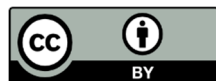

© 2019 by the authors. Submitted for possible open access publication under the terms and conditions of the Creative Commons Attribution (CC BY) license (<http://creativecommons.org/licenses/by/4.0/>).
